# Supplementary material
Source: PubMed Central journal article supplement (PMC4630978)
Supplement: NIHMS704449-supplement-Supplementary_Files.pdf [file NIHMS704449-supplement-Supplementary_Files.pdf]

Supporting Information for:

Accessing Ni(III)-Thiolate versus Ni(II)-Thiyl  
Bonding in a Family of Ni-N<sub>2</sub>S<sub>2</sub> Synthetic  
Models of NiSOD

Ellen P. Broering,<sup>†</sup> Stephanie Dillon,<sup>‡</sup> Eric M. Gale,<sup>†</sup> Ramsey A. Steiner,<sup>†</sup> Joshua  
Telser,<sup>§</sup> Thomas C. Brunold,<sup>‡</sup> and Todd C. Harrop<sup>\*,†</sup>

<sup>†</sup>Department of Chemistry and Center for Metalloenzyme Studies, The University of Georgia,  
1001 Cedar Street, Athens, Georgia 30602, United States

<sup>‡</sup>Department of Chemistry, University of Wisconsin, Madison, Wisconsin 53706, United States

<sup>§</sup>Department of Biological, Chemical and Physical Sciences, Roosevelt University, 430 South  
Michigan Avenue, Chicago, Illinois 60605, United States

\*E-mail: [tharrop@uga.edu](mailto:tharrop@uga.edu)

## **Table of Contents:**

|                                                                                                                |                |
|----------------------------------------------------------------------------------------------------------------|----------------|
| <b>Crystallographic Data</b>                                                                                   | <b>S3-S5</b>   |
| <b>Table S1.</b> Summary of crystallographic data for <b>1</b> , <b>2</b> and <b>4</b> .                       | <b>S3</b>      |
| <b>Figure S1.</b> Representation of the NiN <sub>2</sub> S <sub>2</sub> planes of <b>2</b> and <b>4</b> .      | <b>S4</b>      |
| <b>Chart S1.</b> Bond distances of S <sub>exo</sub> ligand in <b>2</b> and <b>4</b> and comparisons.           | <b>S5</b>      |
| <b>Electrochemistry</b>                                                                                        | <b>S6</b>      |
| <b>Figure S2.</b> CV of <b>4</b> in DMF at RT.                                                                 | <b>S6</b>      |
| <b>Figure S3.</b> CV of <b>2</b> and <b>3</b> in DMF at RT.                                                    | <b>S6</b>      |
| <b>EPR</b>                                                                                                     | <b>S7-S9</b>   |
| <b>Table S2.</b> EPR Comparison of Ni(III) Complexes and Legend.                                               | <b>S7-S9</b>   |
| <b>Reactivity</b>                                                                                              | <b>S10-S11</b> |
| <b>Chart S2.</b> Workup flowchart for the reaction of <b>3<sup>ox</sup></b> with KO <sub>2</sub> in DMF at RT. | <b>S10</b>     |
| <b>Figure S4.</b> ESI-MS (negative mode) of the Et <sub>2</sub> O-soluble portion from Chart S2.               | <b>S11</b>     |
| <b>Spectroscopic Characterization of Complexes 2-5</b>                                                         | <b>S12-S19</b> |
| <b>Figure S5.</b> <sup>1</sup> H NMR of <b>2</b> .                                                             | <b>S12</b>     |
| <b>Figure S6.</b> High Resolution ESI-MS (negative mode) of <b>2</b> .                                         | <b>S13</b>     |
| <b>Figure S7.</b> <sup>1</sup> H NMR of <b>3</b> .                                                             | <b>S14</b>     |
| <b>Figure S8.</b> High Resolution ESI-MS (negative mode) of <b>3</b> .                                         | <b>S15</b>     |
| <b>Figure S9.</b> <sup>1</sup> H NMR of <b>4</b> .                                                             | <b>S16</b>     |
| <b>Figure S10.</b> High Resolution ESI-MS (negative mode) of <b>4</b> .                                        | <b>S17</b>     |
| <b>Figure S11.</b> <sup>1</sup> H NMR of <b>5</b> .                                                            | <b>S18</b>     |
| <b>Figure S12.</b> High Resolution ESI-MS (negative mode) of <b>5</b> .                                        | <b>S19</b>     |

**Table S1.** Summary of crystal data and intensity collection and structure refinement parameters for [Ni<sub>4</sub>(nmp)<sub>4</sub>] (**1**), (Et<sub>4</sub>N)[Ni(nmp)(SPh-*o*-NH<sub>2</sub>)] (**2**), and (Et<sub>4</sub>N)[Ni(nmp)(SPh-*p*-NH<sub>2</sub>)] (**4**).

| Parameters                                         | <b>1</b>                                                                                     | <b>2</b>                                                         | <b>4</b>                                                         |
|----------------------------------------------------|----------------------------------------------------------------------------------------------|------------------------------------------------------------------|------------------------------------------------------------------|
| Formula                                            | C <sub>32</sub> H <sub>32</sub> N <sub>8</sub> Ni <sub>4</sub> O <sub>4</sub> S <sub>4</sub> | C <sub>22</sub> H <sub>34</sub> N <sub>4</sub> NiOS <sub>2</sub> | C <sub>22</sub> H <sub>34</sub> N <sub>4</sub> NiOS <sub>2</sub> |
| Formula weight                                     | 955.70                                                                                       | 493.36                                                           | 493.36                                                           |
| Crystal system                                     | Monoclinic                                                                                   | Monoclinic                                                       | Monoclinic                                                       |
| Space group                                        | C2/c                                                                                         | P2(1)/n                                                          | P 21/c                                                           |
| Crystal color, habit                               | Red                                                                                          | Red, blade                                                       | Red, blade                                                       |
| <i>a</i> , Å                                       | 19.4038(19)                                                                                  | 11.5155(19)                                                      | 20.0499(11)                                                      |
| <i>b</i> , Å                                       | 13.7950(14)                                                                                  | 10.0686(16)                                                      | 11.8010(7)                                                       |
| <i>c</i> , Å                                       | 15.5713(16)                                                                                  | 20.095(3)                                                        | 20.4272(13)                                                      |
| <i>α</i> , deg                                     | 90                                                                                           | 90                                                               | 90                                                               |
| <i>β</i> , deg                                     | 126.8520(10)                                                                                 | 92.038(2)                                                        | 100.585(1)                                                       |
| <i>γ</i> , deg                                     | 90                                                                                           | 90                                                               | 90                                                               |
| <i>V</i> , Å <sup>3</sup>                          | 3335.2(6)                                                                                    | 2328.4(7)                                                        | 4751.0(5)                                                        |
| <i>Z</i>                                           | 4                                                                                            | 4                                                                | 8                                                                |
| $\rho_{\text{calcd}}$ , g/cm <sup>3</sup>          | 1.903                                                                                        | 1.407                                                            | 1.379                                                            |
| <i>T</i> , K                                       | 100(2)                                                                                       | 100(2)                                                           | 100(2)                                                           |
| abs coeff, $\mu$ (MoK $\alpha$ ), mm <sup>-1</sup> | 2.528                                                                                        | 1.034                                                            | 1.014                                                            |
| $\theta$ limits, deg                               | 1.97-25.99                                                                                   | 2.01-30.03                                                       | 2.002-30.519                                                     |
| total no. of data                                  | 19261                                                                                        | 34465                                                            | 75036                                                            |
| no. of unique data                                 | 3274                                                                                         | 6815                                                             | 14491                                                            |
| no. of parameters                                  | 263                                                                                          | 271                                                              | 541                                                              |
| GOF of F <sup>2</sup>                              | 1.080                                                                                        | 1.023                                                            | 1.021                                                            |
| R <sub>1</sub> , <sup>[a]</sup> %                  | 0.0393                                                                                       | 0.0378                                                           | 0.0371                                                           |
| wR <sub>2</sub> , <sup>[b]</sup> %                 | 0.1031                                                                                       | 0.0873                                                           | 0.0959                                                           |
| max, min peaks, e/Å <sup>3</sup>                   | 0.9280, 0.7029                                                                               | 0.420, -0.497                                                    | 0.696, -0.651                                                    |

$$^a R_1 = \sum |F_o| - |F_c| / \sum |F_o| ; ^b wR_2 = \{ \sum [w(F_o^2 - F_c^2)^2] / \sum [w(F_o^2)^2] \}^{1/2}$$

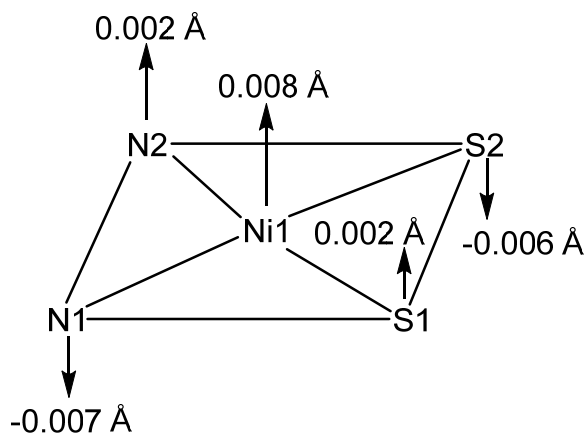

(Et<sub>4</sub>N)[Ni(nmp)(SPh-*o*-NH<sub>2</sub>)] (**2**)

Mean Deviation: 0.005 Å

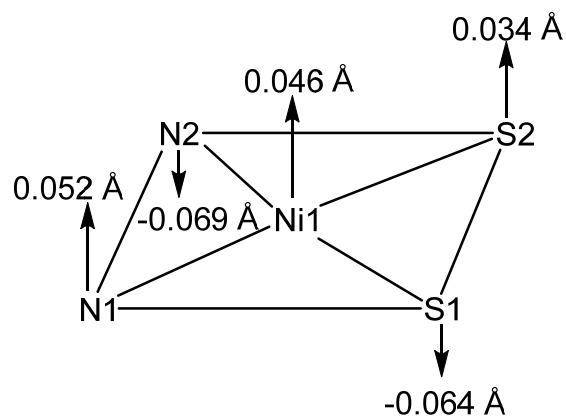

(Et<sub>4</sub>N)[Ni(nmp)(SPh-*p*-NH<sub>2</sub>)] (**4**)

Mean Deviation: 0.053 Å

**Figure S1.** Schematic representation of the NiN<sub>2</sub>S<sub>2</sub> plane for (Et<sub>4</sub>N)[Ni(nmp)(SPh-*o*-NH<sub>2</sub>)] (**2**) and (Et<sub>4</sub>N)[Ni(nmp)(SPh-*p*-NH<sub>2</sub>)] (**4**) and deviations of each atom from the weighted least-square plane. N2, N1, and S1 represent the donor atoms derived from the nmp<sup>2-</sup> ligand, whereas S2 originates from the exogenous S donor (S<sub>exo</sub>).

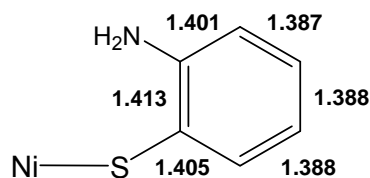

(2)

C-S: 1.7730 Å  
 C-N: 1.392 Å  
 C-C (avg.):  $1.397 \pm 0.011$  Å

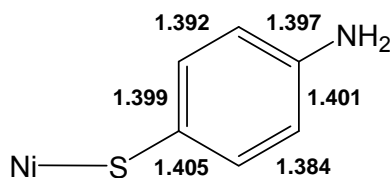

(4)

C-S: 1.7722 Å  
 C-N: 1.406 Å  
 C-C (avg.):  $1.396 \pm 0.007$  Å

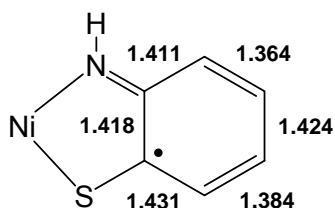

*Ni-coordinated*  
*o-iminothiosemiquinonate*  
 C-S: 1.724 Å  
 C-N: 1.348 Å  
 C-C (avg.):  $1.405 \pm 0.026$  Å

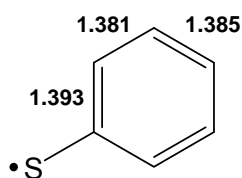

*phenylthiyl radical (calc.)*  
 C-S: 1.750 Å  
 C-C (avg.):  $1.386 \pm 0.006$  Å

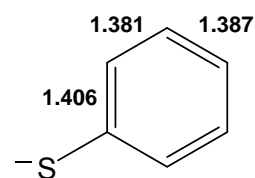

*phenylthiolate anion (calc.)*  
 C-S: 1.756 Å  
 C-C (avg.):  $1.391 \pm 0.013$  Å

**Chart S1.** *Top:* Relevant bond distances of the  $S_{exo}$  ligand in the anions of **2** and **4**. *Bottom:* Same parameters for a structurally-characterized Ni(II)-N,S-coordinated *o*-iminothiosemiquinonate (see *J. Am. Chem. Soc.* **2001**, *123*, 10012) and the calculated bond lengths of the phenylthiyl radical and phenylthiolate anion (ROHF/3-21G\*, see *J. Phys. Chem.* **1992**, *96*, 5344).

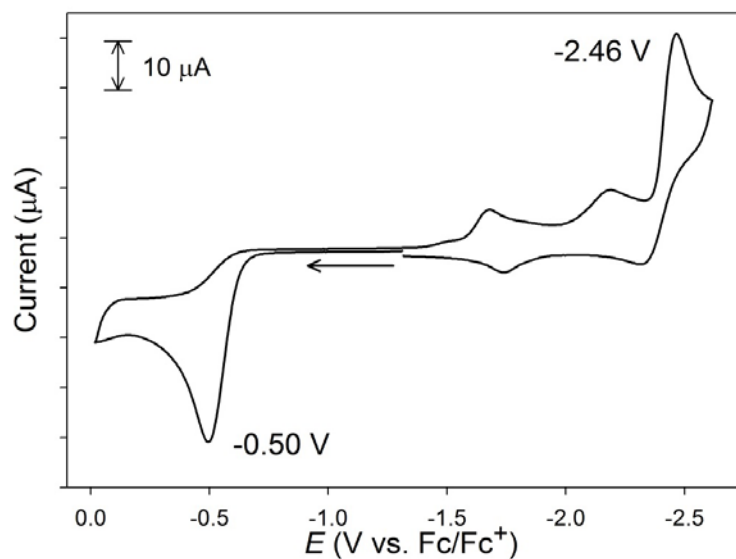

**Figure S2.** CV of an 8 mM solution of **4** in DMF at RT (glassy carbon working electrode, 0.1 M  $n\text{Bu}_4\text{NPF}_6$  as supporting electrolyte, 100 mV/s scan speed). Arrow shows direction of scan.

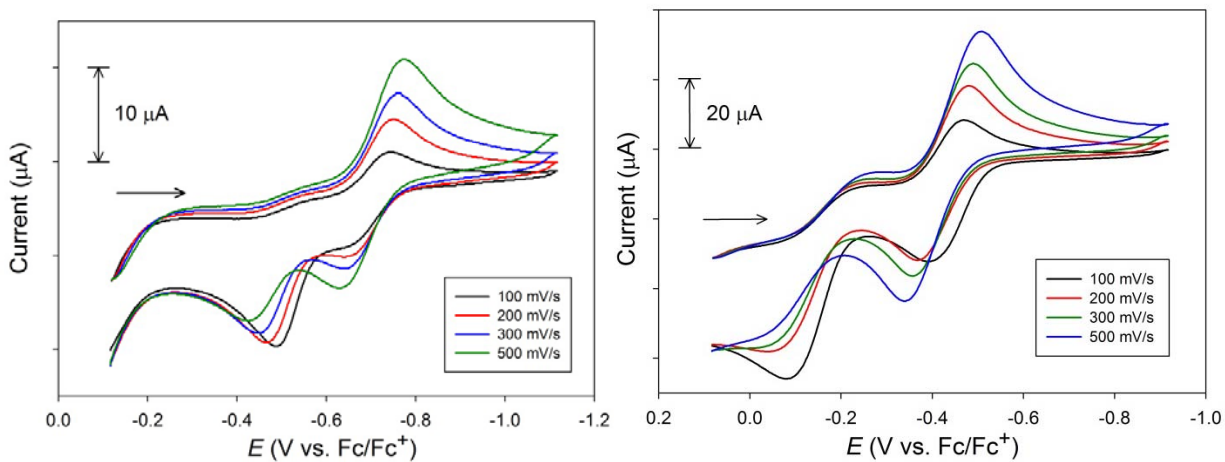

**Figure S3.** CV of 8 mM solutions of **2** (left) and **3** (right) in DMF at RT (glassy carbon working electrode, 0.1 M  $n\text{Bu}_4\text{NPF}_6$  as supporting electrolyte, 100 mV/s scan speed). Arrow shows the direction of the scan.

**Table S2.** EPR parameters for Ni(III) coordination complexes with  $N_xS_y$  donor sets relevant to the present study.

| Complex                                                                                          | g values: [max, mid, min], avg | Ground state assignment <sup>a</sup> | Reference                                          |
|--------------------------------------------------------------------------------------------------|--------------------------------|--------------------------------------|----------------------------------------------------|
| <b>cis-N2S2 donor set, N3S2 donor set <sup>b</sup></b>                                           |                                |                                      |                                                    |
| [Ni(nmp)(SPh- <i>o</i> -NH <sub>2</sub> - <i>p</i> -CF <sub>3</sub> )] ( <b>3<sup>ox</sup></b> ) | [2.132, 2.028, 2.004], 2.055   | $(d_{z^2}^1)$                        | this work                                          |
| [Ni(emb)] <sup>-</sup>                                                                           | [2.29, 2.11, 2.04], 2.15       | uncertain                            | <i>Inorg. Chem.</i> <b>1987</b> , 26, 3645.        |
| [Ni(ema)] <sup>-</sup>                                                                           | [2.23, 2.18, 2.01], 2.14       | $d_{z^2}^1$                          | <i>Inorg. Chem.</i> <b>1991</b> , 30, 734.         |
| [Ni(phma)] <sup>-</sup>                                                                          | [2.20, 2.17, 2.01], 2.13       | $d_{z^2}^1$                          | <i>Inorg. Chem.</i> <b>1991</b> , 30, 734.         |
| [Ni(emi)] <sup>-</sup>                                                                           | [2.44, 2.27, 1.96], 2.22       | uncertain                            | <i>Inorg. Chem.</i> <b>1991</b> , 30, 734.         |
| [Ni(phmi)] <sup>-</sup>                                                                          | [2.55, 2.14, 2.00], 2.23       | uncertain                            | <i>Angew. Chem. Int. Ed.</i> <b>1998</b> , 37, 260 |
| [Ni(phmi)(py)] <sup>-</sup>                                                                      | [2.313, 2.281, 2.000], 2.198   | $d_{z^2}^1$                          |                                                    |
| [Ni(ema)·(CH <sub>2</sub> ) <sub>3</sub> ] <sup>-</sup>                                          | [2.36, 2.23, 2.01], 2.20       | $d_{z^2}^1$                          | <i>Inorg. Chem.</i> <b>2007</b> , 46, 7536.        |
| [Ni(L <sub>1</sub> )]                                                                            | [2.26, 2.19, 2.01], 2.15       | $d_{z^2}^1$                          | <i>Inorg. Chem.</i> <b>2014</b> , 53, 6512.        |
| [Ni(L)(im)] <sup>+c</sup>                                                                        | [2.315, 2.177, 2.029], 2.174   | $d_{z^2}^1$                          | <i>Inorg. Chem.</i> <b>2010</b> , 49, 6399.        |
| <b>S4 donor set <sup>d</sup></b>                                                                 |                                |                                      |                                                    |
| [Ni(nbdt) <sub>2</sub> ] <sup>-</sup>                                                            | [2.14, 2.05, 2.05], 2.08       | uncertain                            | <i>J. Am. Chem. Soc.</i> <b>1990</b> , 112, 3218.  |
| [Ni(mnt) <sub>2</sub> ] <sup>-</sup>                                                             | [2.14, 2.04, 1.99], 2.06       | $(d_{xz}^1)^g$                       | <i>Inorg. Chem.</i> <b>1998</b> , 37, 1361.        |
| [Ni(S <sub>2</sub> C <sub>2</sub> Me <sub>2</sub> ) <sub>2</sub> ] <sup>-</sup>                  | [2.118, 2.041, 2.000], 2.053   | $(d_{xz}^1)^g$                       | <i>Inorg. Chem.</i> <b>2001</b> , 40, 4257.        |
| [Ni(S(NH)C <sub>6</sub> H <sub>4</sub> ) <sub>2</sub> ] <sup>-</sup>                             | [2.126, 2.028, 2.005], 2.053   | uncertain                            | <i>J. Am. Chem. Soc.</i> <b>1967</b> , 89, 2866.   |
| <b>trans-N2S4 donor set</b>                                                                      |                                |                                      |                                                    |
| [Ni(pdte) <sub>2</sub> ] <sup>-e</sup>                                                           | [2.137, 2.137, 2.038], 2.104   | $d_{z^2}^1$                          | <i>J. Am. Chem. Soc.</i> <b>1990</b> , 112, 2955.  |
| <b>N6 donor set <sup>f</sup></b>                                                                 |                                |                                      |                                                    |
| [Ni(H <sub>3</sub> G <sub>3</sub> a)(NH <sub>3</sub> ) <sub>2</sub> ]                            | [2.178, 2.178, 2.019], 2.125   | $d_{z^2}^1$                          | <i>Inorg. Chem.</i> <b>1978</b> , 17, 1630.        |
| [Ni(Me <sub>2</sub> [14]aneN <sub>4</sub> )(NCO) <sub>2</sub> ] <sup>+</sup>                     | [2.169, 2.169, 2.055], 2.131   | $d_{z^2}^1$                          | <i>Inorg. Chem.</i> <b>1973</b> , 12, 1.           |

Ligand abbreviations: ema = *N,N'*-ethylenebis-2-mercaptoacetamide; (ema) $\cdot$ (CH<sub>2</sub>)<sub>3</sub> = *N,N'*-ethylenebis(2-propylmercaptoacetamide); emb = *N,N'*-ethylenebis(*o*-mercaptobenzamide); emi = *N,N'*-ethylenebis-2-mercaptoisobutyramide; H<sub>3</sub>G<sub>3</sub>a = trianion (i.e., mono-H) of tripeptide glycylglycylglycinamide; im = imidazole; L = dianion of 2,2'-(2,2'-bipyridine-6,6'-diyl)bis(1,1-diphenylethanethiol); L<sub>1</sub> = trianion of *N*-(2-mercapto-2-methylpropanoyl)-*N'*-(2-mercapto-2-methylpropyl)-1,2-diaminoethane; Me<sub>2</sub>[14]aneN<sub>4</sub> = 2,3-dimethyl-1,4,8,11-tetraazacyclo-tetradecane; mnt = dianion of maleonitriledithiolate (S<sub>2</sub>C<sub>2</sub>(CN)<sub>2</sub><sup>2-</sup>); nbdt = dianion of norbornane-2,3-dithiolate; nmp = dianion of *N*-(2-mercaptoethyl)picolinamide); pdtc = dianion of pyridine-2,6-bis(thiocarboxylate); phma = *N,N'*-1,2-phenylenebis-2-mercaptoacetamide); phmi = tetraanion of *N,N'*-1,2-phenylenebis(2-sulfanyl-2-methylpropionamide); py = pyridine; S(NH)C<sub>6</sub>H<sub>4</sub>)<sub>2</sub><sup>-</sup> = dianion of *o*-amidothiophenolate.

<sup>a</sup> As determined in the original work, parentheses indicates a ground state that is extensively delocalized onto the ligands, as opposed to being largely Ni-3*d*-centered. For a detailed discussion of **3<sup>ox</sup>**, see the main text.

<sup>b</sup> In a number of cases for these four-coordinate N<sub>2</sub>S<sub>2</sub> donor set complexes, imine N donor base (typically pyridine or imidazole) was added which coordinates on one axial position and gives a characteristic triplet hyperfine splitting (<sup>14</sup>N, *I* = 1) at *g*<sub>min</sub>, indicating that this corresponds to the molecular *z* direction (i.e., so that this is *g*<sub>*z*</sub>) and that the ground state is *d*<sub>*z*<sup>2</sup></sub><sup>1</sup>; however, a shift in the ground state may have occurred with base binding (e.g., for pyridine binding to [Ni(emi)]<sup>-</sup>). Such EPR results of axial base binding are not included here, except for the case of [Ni(phmi)]<sup>-</sup>, as a representative example, and the last member of this series, as explained in footnote *c*.

<sup>c</sup> For this complex, no formal Ni(III) species with an N<sub>2</sub>S<sub>2</sub> donor set was observed. Upon oxidation of the four-coordinate Ni(II) parent compound, [Ni(L)] (S<sub>2</sub>N<sub>2</sub> donor set), a diamagnetic di-Ni(III) complex is formed; however, addition of excess imidazole to this complex leads to formation of mononuclear [Ni(L)(im)]<sup>+</sup>, which has a *d*<sub>*z*<sup>2</sup></sub><sup>1</sup> ground state as supported by extensive computational analysis (calculated spin density on Ni alone = 82%; calculated *g* = [2.252, 2.199, 2.071]).

<sup>d</sup> The electronic structure of such square-planar S<sub>4</sub> donor set bis-dithiolato complexes has historically been the source of much controversy (see *Inorg. Chem.* **2011**, *50*, 9741; *Chem.-Eur. J.* **2007**, *13*, 2783). Among many examples, the dimethylthiolene complex listed herein has been thoroughly analyzed (see *Inorg. Chem.* **2001**, *40*, 4257; *Chem.-Eur. J.* **2003**, *125*, 9158). The electronic structure of the nbdt complex has not been so analyzed (and that its reported EPR is axial is unexpected), but may be similar to the mnt complex; the nbdt complex does not coordinate axial bases, in contrast to those with more unambiguous *d*<sub>*z*<sup>2</sup></sub><sup>1</sup> ground states (e.g., the (ema) $\cdot$ (CH<sub>2</sub>)<sub>3</sub>, emb, and emi complexes, and the pdtc complex with its “built-in” axial imino N-



donors). Its ground state was given as ( $d_{x^2-y^2}^1$ ), but this seems unreasonable in light of subsequent experimental and theoretical studies on such systems.

<sup>e</sup> This 6-coordinate complex has a *trans*-N<sub>2</sub>S<sub>4</sub> donor set. Hyperfine coupling from two equivalent, axial <sup>14</sup>N ligands was well resolved at both  $g_{\perp}$  and  $g_{\parallel}$ . A complex enriched in <sup>61</sup>Ni ( $I = 3/2$ ) was also prepared and all evidence support a  $d_{z^2}^1$  ground state.

<sup>f</sup> These 6-coordinate complexes with non-redox active ligands are classic examples of Ni(III) with  $d_{z^2}^1$  ground state. The tripeptide complex has equivalent, *trans* ammine ligands which give rise to resolved <sup>14</sup>N hyperfine coupling at  $g_{\parallel}$ ; the tetraaza macrocycle complex has equivalent, *trans* *N*-cyanato ligands; the EPR data is for powder, hence no hyperfine coupling was resolved.

<sup>g</sup> The coordinate system used by Huyett *et al.* for the mnt complex was defined so that the  $z$  axis was perpendicular to the molecular plane, and the  $y$  axis bisected the chelate rings with the  $x$  axis between the rings; the later model of Lim *et al.*, which is used here, defined the  $x$  axis as bisecting the chelate ring and the  $y$  axis bisecting the S-Ni-S angle external to the chelates. In the more recent calculations, those for the dimethyldithiolene, the unpaired spin is only partially (25%; with 60% on the S atoms) on Ni (in  $3d_{xz}$  AO;  $5b_{2g}$  using  $D_{2h}$  symmetry) (see *J. Am. Chem. Soc.* **2003**, *125*, 9158). The calculated  $g$  values for this complex are:  $g = [2.115, 2.040, 1.969]$ , in excellent agreement with experiment.

**Chart S2.** Workup flowchart for the reaction of  $3^{ox}$  with  $KO_2$  in DMF at RT.

A 3 mL DMF solution of **3** (56.5 mg, 0.101 mmol) was mixed with CAN (55.3 mg, 0.101 mmol) to generate the green-colored  $3^{ox}$ . To this solution was added a ~2 mL DMF solution of  $KO_2$  (7.8 mg, 0.11 mmol) solubilized with 18C6 (104.1 mg, 0.3938 mmol). Upon addition of  $KO_2$ , the green color of  $3^{ox}$  immediately changed to brown-red. This solution was allowed to mix at RT for ~5 min. DMF was then removed via short-path vacuum distillation and the dark residue was worked-up as follows:

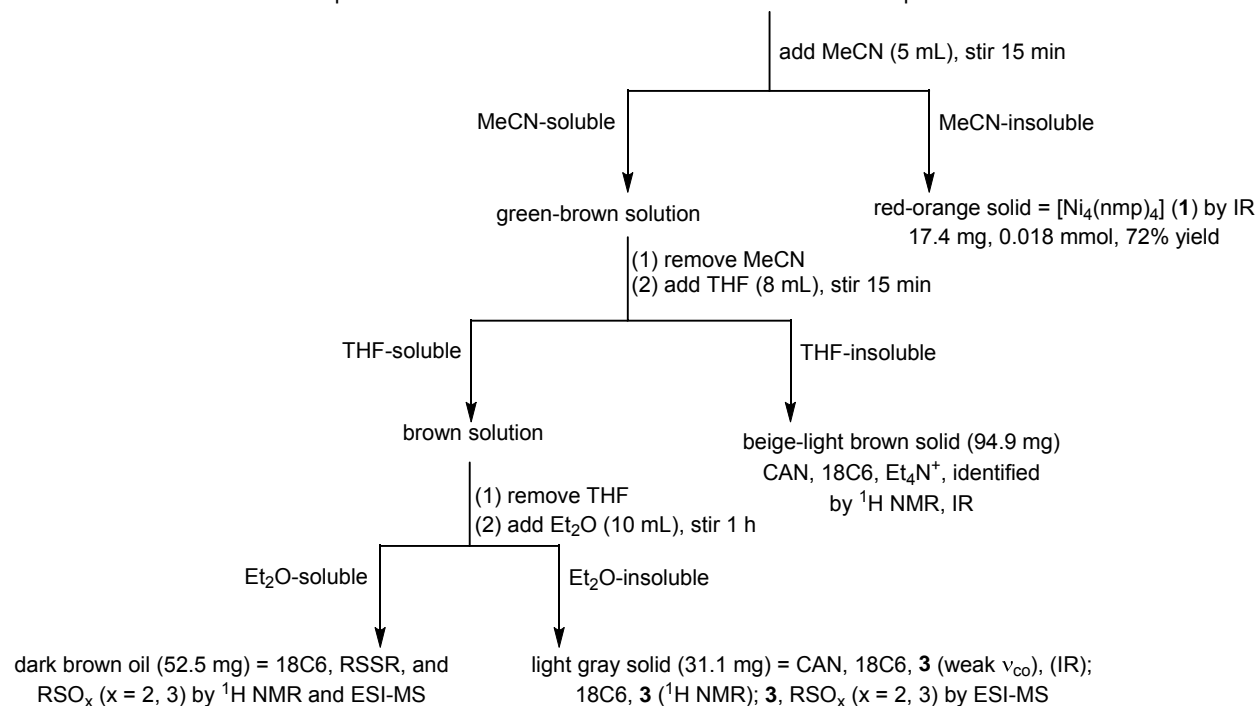

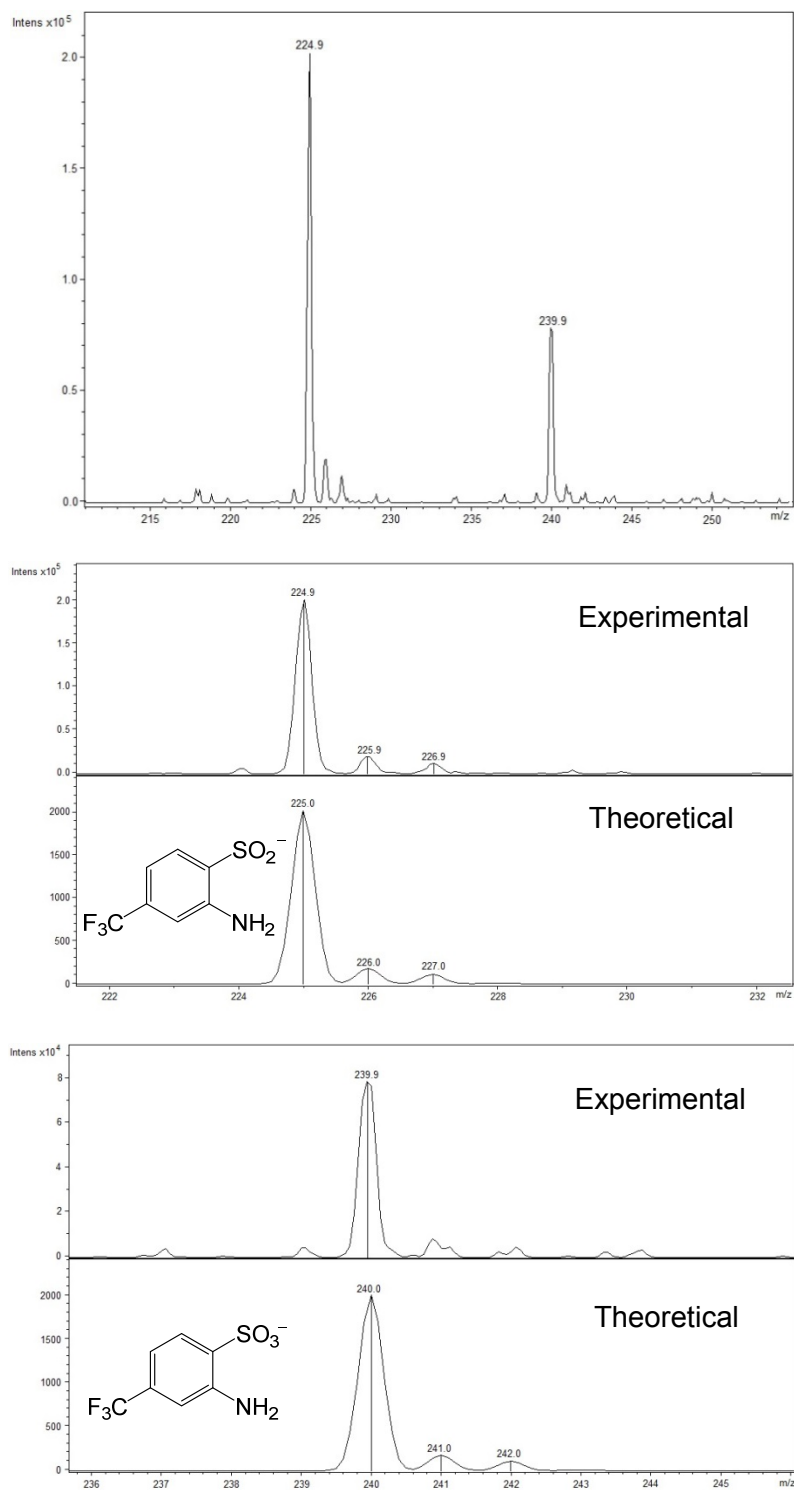

**Figure S4.** Low resolution ESI-MS (negative mode) of the Et<sub>2</sub>O-soluble portion from Chart S2. Middle and bottom represent a zoom-in of the *m/z* 224.9 and 239.9 peaks. Theoretical fit on the bottom.

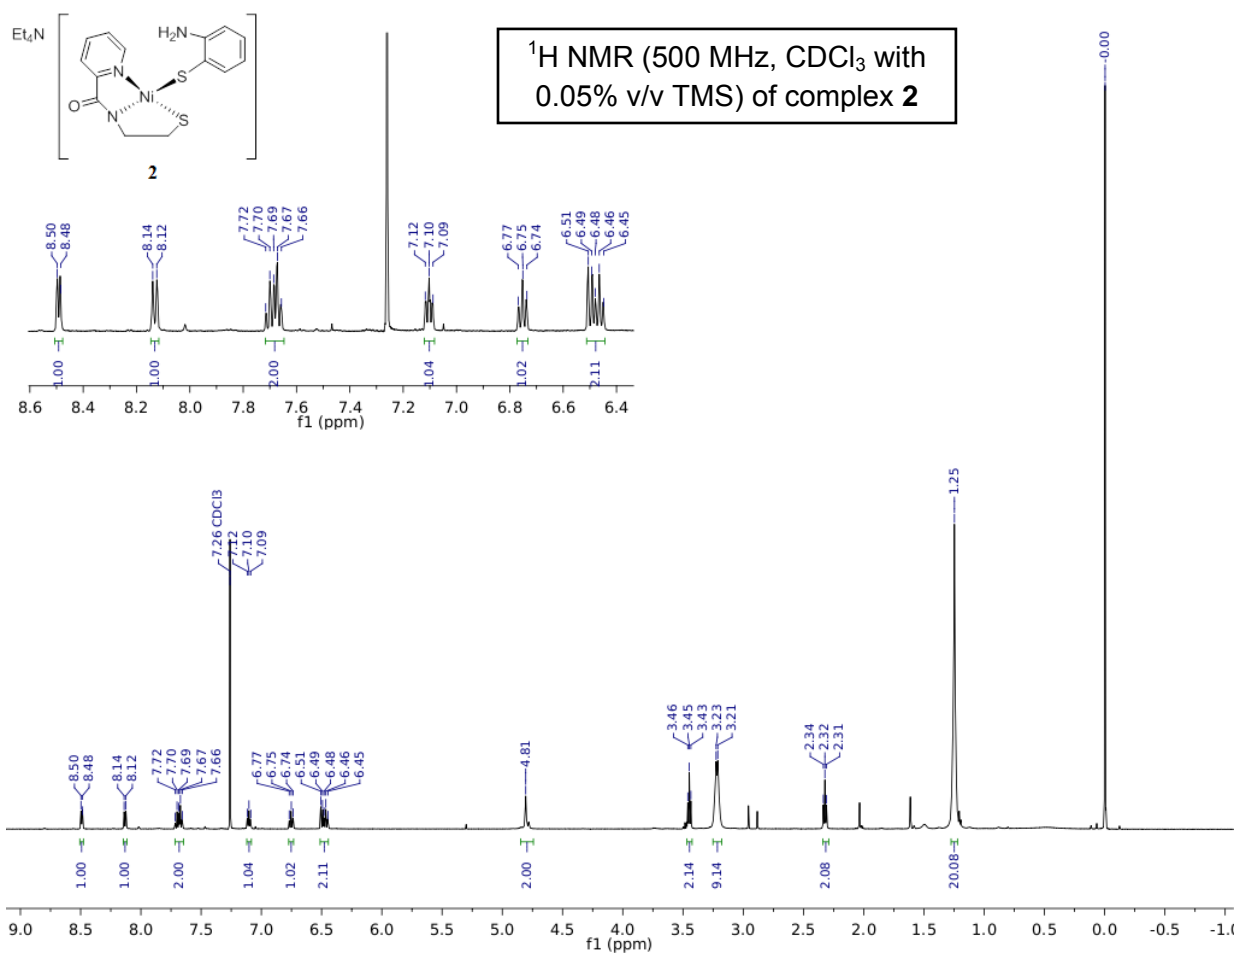

**Figure S5.** <sup>1</sup>H NMR spectrum of **2** in CDCl<sub>3</sub> containing 0.05% v/v TMS at RT. Inset shows expanded aromatic region. Residual protio solvent (7.26 ppm), H<sub>2</sub>O (1.61 ppm), and TMS (0.00 ppm) are present. A minor amount of DMF (8.02, 2.96, 2.88 ppm) and MeCN (2.03 ppm) from workup are also present.

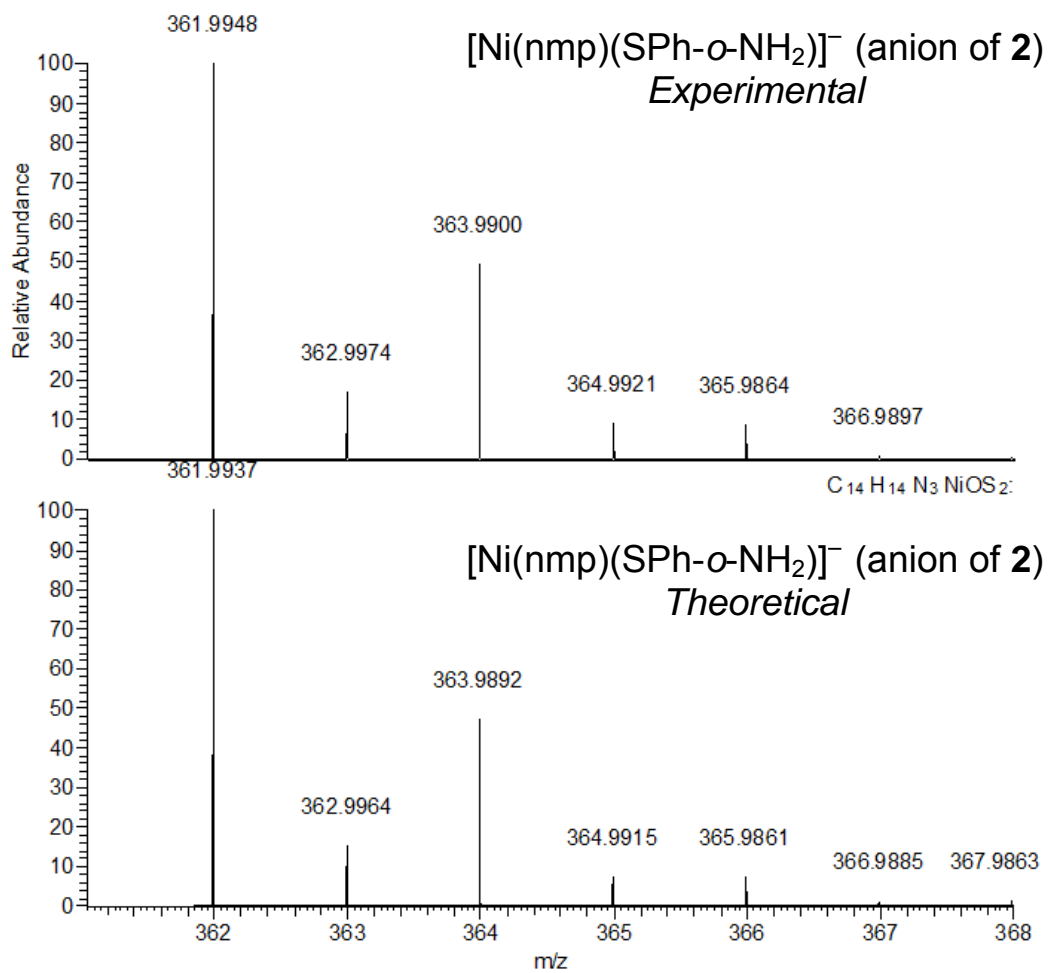

**Figure S6.** *Top:* High resolution ESI-MS (negative mode) of the anion of **2** [M-Et<sub>4</sub>N]<sup>-</sup> in MeCN at RT. *Bottom:* Theoretical MS for the anion of **2**.

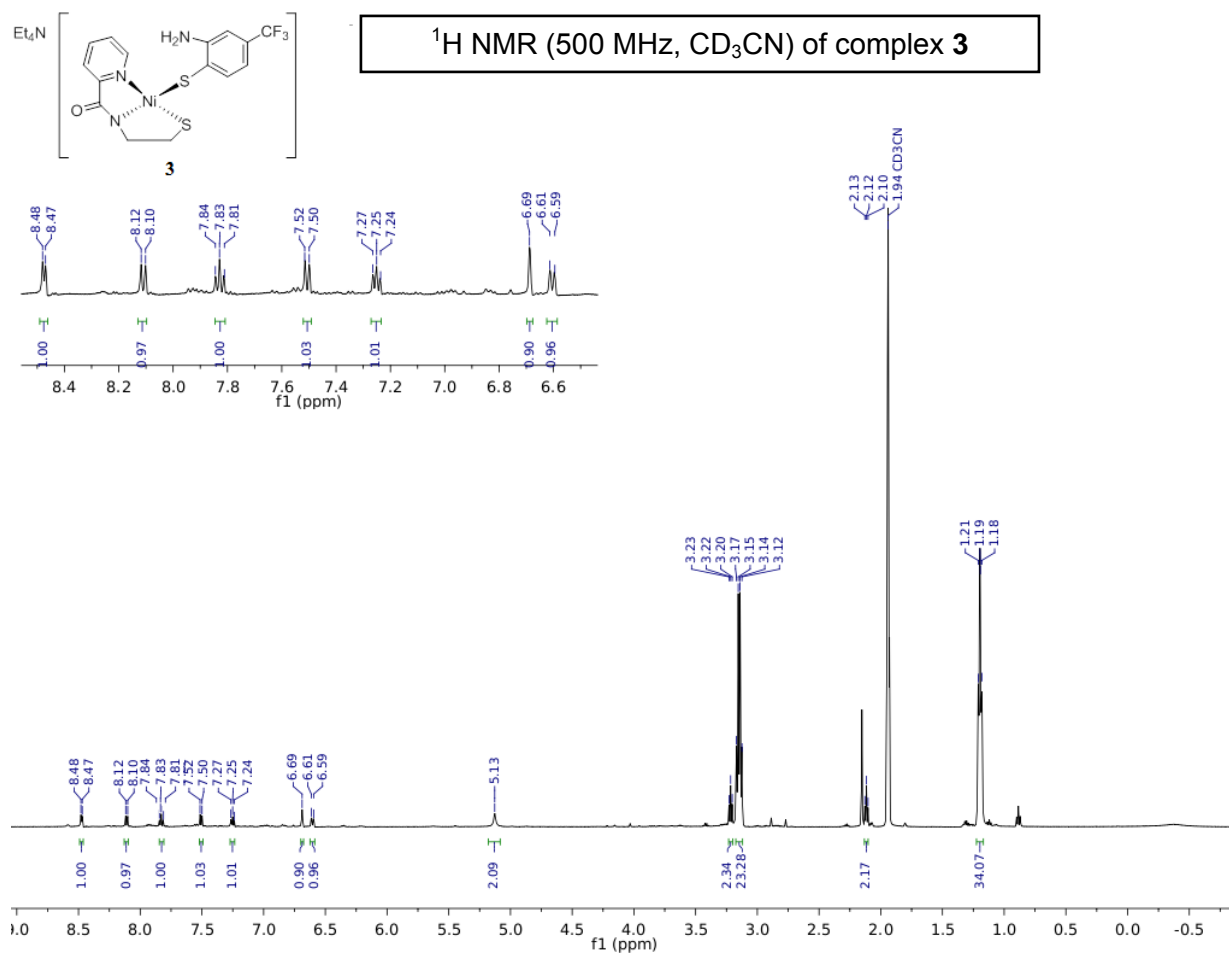

**Figure S7.**  $^1\text{H}$  NMR spectrum of **3** in  $\text{CD}_3\text{CN}$  at RT. Inset shows expanded aromatic region. Residual protio solvent (1.94 ppm) and  $\text{H}_2\text{O}$  (2.13 ppm) are present. A minor amount of DMF (7.92, 2.89, 2.77 ppm) and  $\text{Et}_2\text{O}$  (3.42, 1.12 ppm) from workup are also present.

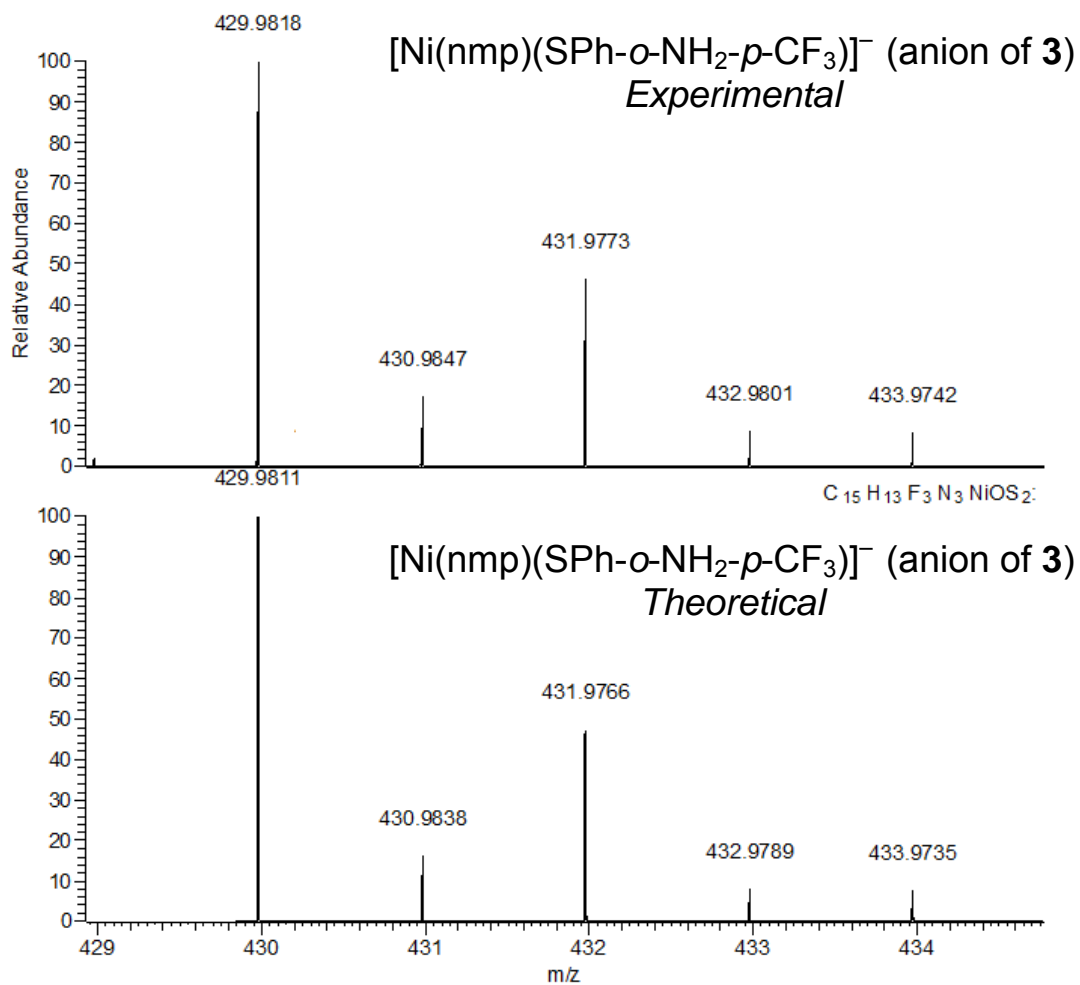

**Figure S8.** *Top:* High resolution ESI-MS of the anion of **3** [M-Et<sub>4</sub>N]<sup>-</sup> in MeCN at RT. *Bottom:* Theoretical MS for the anion of **3**.

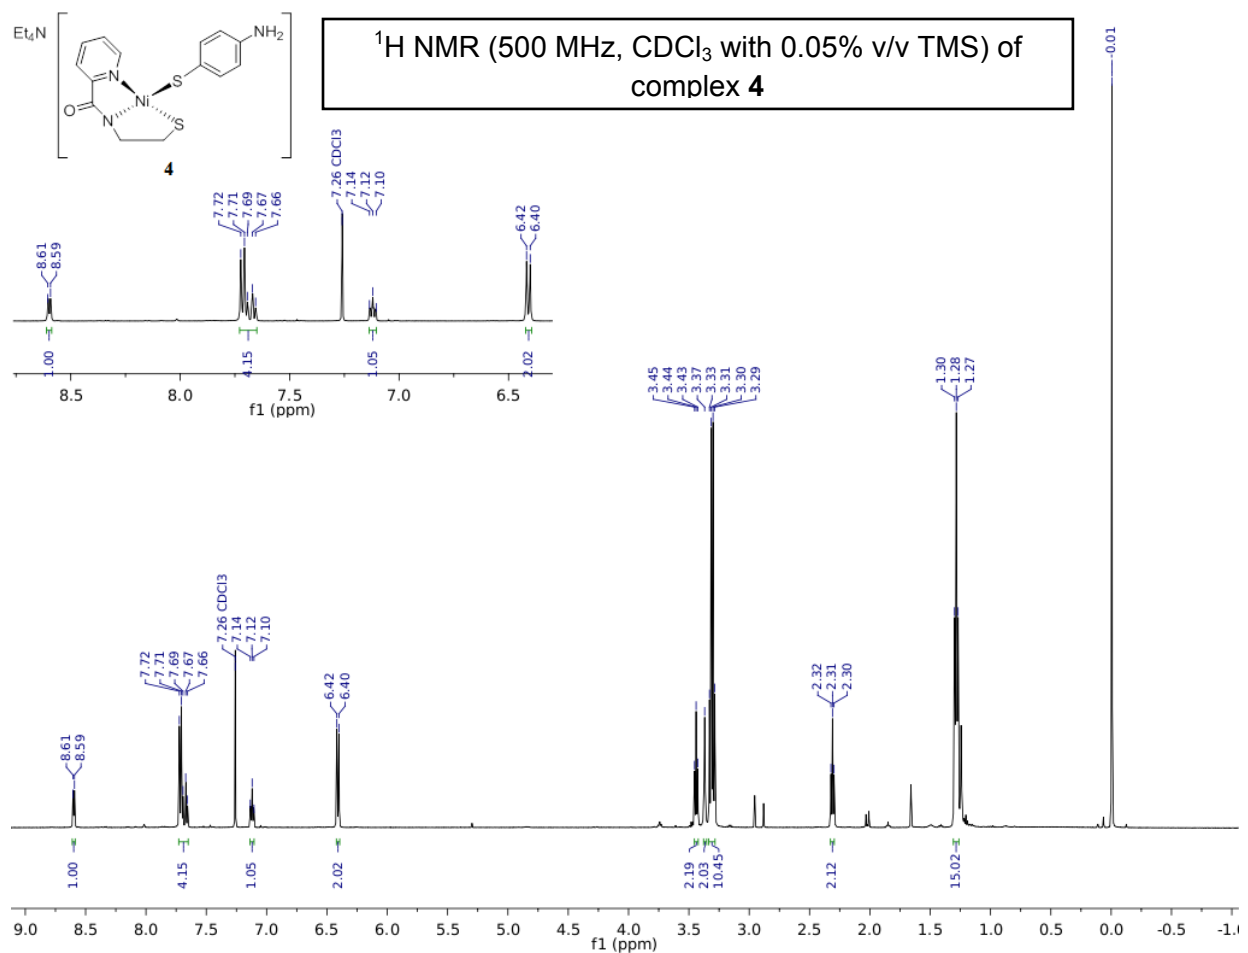

**Figure S9.** <sup>1</sup>H NMR spectrum of **4** in CDCl<sub>3</sub> containing 0.05% v/v TMS at RT. Inset shows expanded aromatic region. Residual protio solvent (7.26 ppm), H<sub>2</sub>O (1.66 ppm), and TMS (0.00 ppm) are present. A minor amount of DMF (8.02, 2.95, 2.88 ppm), THF (3.74, 1.85 ppm), and MeCN (2.03 ppm) from workup are also present.



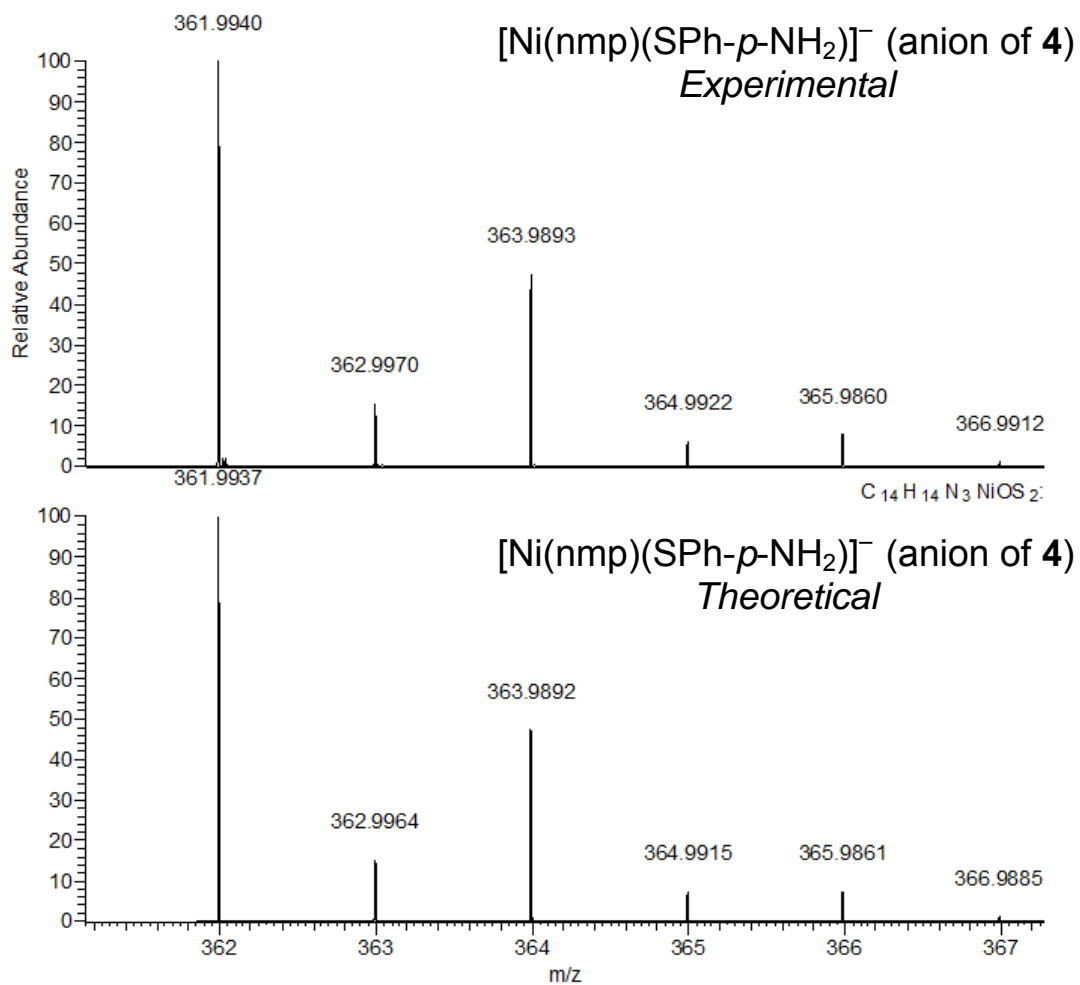

**Figure S10.** *Top:* High resolution ESI-MS of the anion of **4** [M-Et<sub>4</sub>N]<sup>-</sup> in MeCN at RT. *Bottom:* Theoretical MS of the anion of **4**.

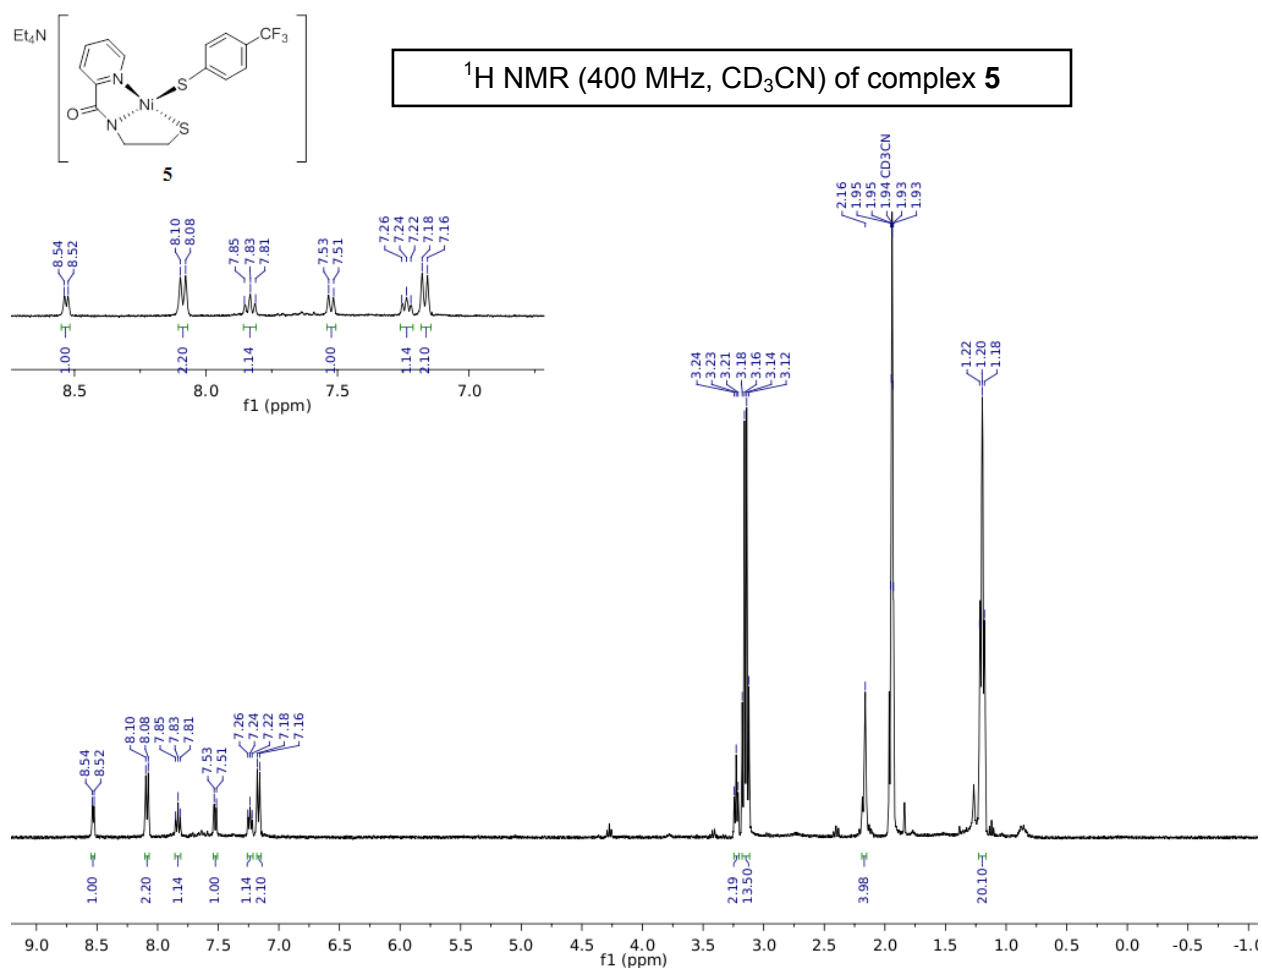

**Figure S11.**  $^1\text{H}$  NMR spectrum of **5** in  $\text{CD}_3\text{CN}$  at RT. Inset shows expanded aromatic region. Residual protio solvent (1.94 ppm) and  $\text{H}_2\text{O}$  (2.16 ppm) are present. A minor amount of THF (3.64, 1.80 ppm) and  $\text{Et}_2\text{O}$  (3.42, 1.12 ppm) from workup is also present.

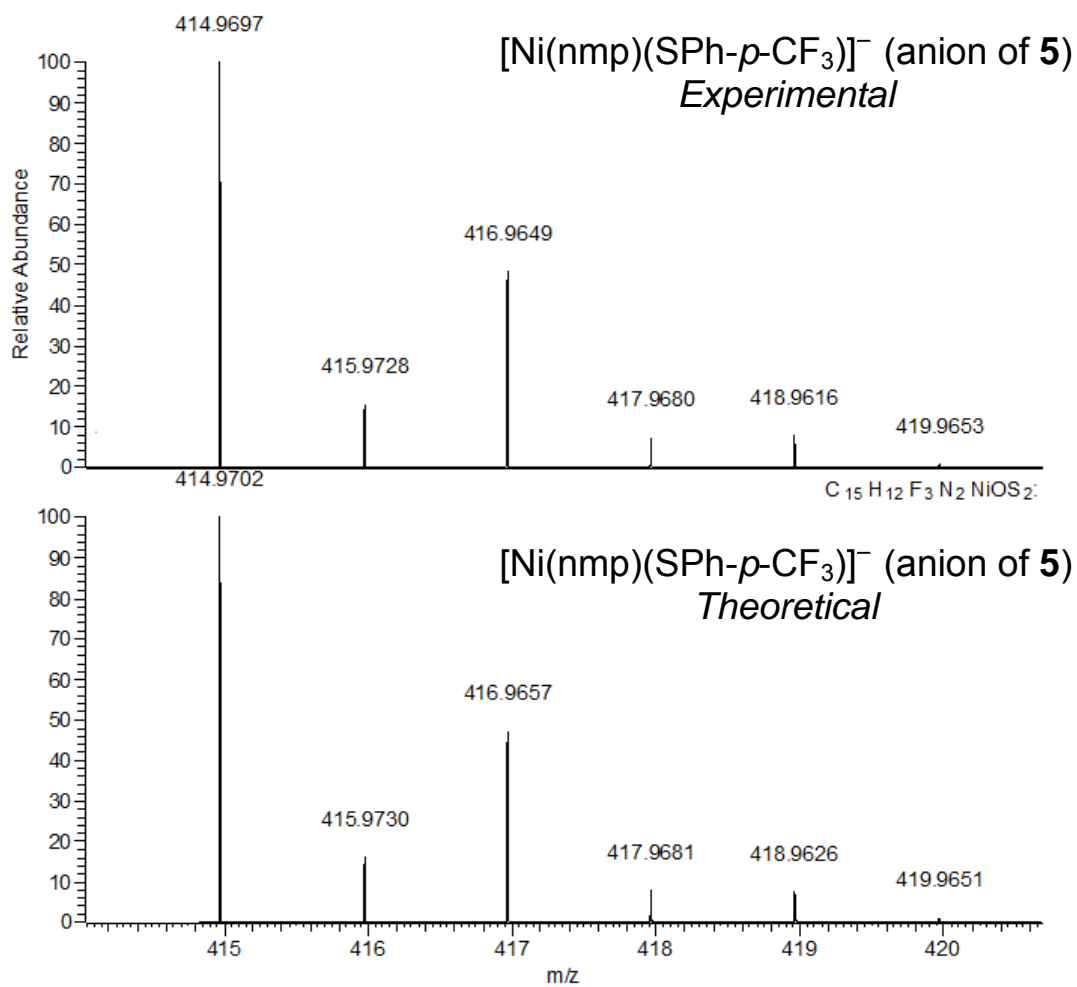

**Figure S12.** *Top:* High resolution ESI-MS of the anion of **5**  $[\text{M-Na}]^-$  in MeCN at RT. *Bottom:* theoretical MS of the anion of **5**.
